# Supplementary material for: HCV-Induced Immunometabolic Crosstalk in a Triple-Cell Co-Culture Model Capable of Simulating Systemic Iron Homeostasis
Source: MDPI journal article supplement (doi:10.3390/cells10092251), 2021-08-30
Supplement: s1 [file s1]

**Supplementary Table S1.** Iron measurements in the triple-cell co-culture system during HCV infection.

| Cell line     | (h) p.i. | Fe Concentration<br>(ng/ $\mu$ l) $\pm$ SD | -fold change of mock-<br>infected control |
|---------------|----------|--------------------------------------------|-------------------------------------------|
| <b>Huh7.5</b> | 24       | 1.63 $\pm$ 0.16                            | 1.4                                       |
|               | 48       | 0.72 $\pm$ 0.07                            | 0.6                                       |
|               | 72       | 1.10 $\pm$ 0.11                            | 0.9                                       |
|               | 96       | 1.08 $\pm$ 0.10                            | 0.9                                       |
| <b>CaCO2</b>  | 24       | b.d.l.                                     | -                                         |
|               | 48       | b.d.l.                                     | -                                         |
|               | 72       | 2.33 $\pm$ 0.23                            | 1.7                                       |
|               | 96       | 1.06 $\pm$ 0.11                            | 0.8                                       |
| <b>THP-1</b>  | 24       | 1.10 $\pm$ 0.11                            | 0.9                                       |
|               | 48       | 1.32 $\pm$ 0.13                            | 1.1                                       |
|               | 72       | 1.78 $\pm$ 0.18                            | 1.5                                       |
|               | 96       | 1.85 $\pm$ 0.19                            | 1.6                                       |

Key: SD, Standard deviation; b.d.l., below detection limit.

## Supplementary Materials and Methods

### Iron measurements

Whole cell extracts from Huh7.5, CaCO2 and THP-1 cells from HCV- and mock-infected triple-cell co-cultures were prepared as described in Materials and Methods, diluted 1:10 with phosphate buffer saline (PBS) and subjected to iron measurements using an Abbott ARCHITECT 2000 biochemical analyzer, in triplicate.
